# Supplementary material for: Bigger Is Fitter? Quantitative Genetic Decomposition of Selection Reveals an Adaptive Evolutionary Decline of Body Mass in a Wild Rodent Population
Source: PLOS journal article supplement (doi:10.1371/journal.pbio.1002592), 2017-01-26
Supplement: S2 (10.1371/journal.pbio.1002592.s002) [file journal.pbio.1002592.s002]

# Supplementary information for Bigger Is Fitter? Quantitative Genetic Decomposition of Selection Reveals an Adaptive Evolutionary Decline of Body Mass in a Wild Rodent Population

Bonnet Timothée<sup>1,\*</sup>, Wandeler Peter<sup>1,2</sup>, Camenisch Glauco<sup>1</sup>, Postma Erik<sup>1,3</sup>

**1** Department of Evolutionary Biology and Environmental Studies, University of Zurich, Zurich, Switzerland

**2** Natural History Museum Fribourg, Fribourg, Switzerland

**3** Centre for Ecology and Conservation, College of Life and Environmental Sciences, University of Exeter, Cornwall Campus, Penryn, United Kingdom

\* timothee.bonnet@ieu.uzh.ch

**Table S2 Outcome of the logistic regression of juvenile overwinter survival on potential adult mass and time between birth and winter.**

| Parameters           | Estimates | 95% CI         | pMCMC   |
|----------------------|-----------|----------------|---------|
| Intercept            | 12.41     | 2.48; 23.00    | 0.005   |
| Sex (male)           | -1.07     | -1.45; -0.68   | < 0.001 |
| Potential adult mass | -0.30     | -0.58; -0.06   | 0.007   |
| Days winter-birth    | -0.11     | -0.20; -0.02   | 0.006   |
| Interaction          | 0.0025    | 0.0001; 0.0048 | 0.008   |

All values are on the logit scale. Estimates are means of posterior distributions, 95% CI are highest posterior density credibility intervals and pMCMC are posterior bayesian p-values. Potential adult mass was estimated from a growth model, along with birth date. The parameter Interaction refers to the interaction of potential adult mass with the time interval between the onset of winter and estimated birth date.
